# Supplementary material for: Triclosan causes spontaneous abortion accompanied by decline of estrogen sulfotransferase activity in humans and mice
Source: PubMed Central journal article supplement (PMC4678904; doi:10.1038/srep18252), 2015-12-15
Supplement: srep18252-s1.pdf [file srep18252-s1.pdf]

## Supplementary Information

### **Triclosan causes spontaneous abortion accompanied by decline of strogen sulfotransferase activity in humans and mice**

Short title: TCS-caused spontaneous abortion

#Xiaoli Wang<sup>1,2</sup>, #Xiaojiao Chen<sup>1,3,4</sup>, Xuejiao Feng<sup>2</sup>, Fei Chang<sup>2</sup>, Minjian Chen<sup>1,4</sup>,  
Yankai Xia<sup>1,3,4\*</sup>, Ling Chen<sup>1,2\*</sup>

<sup>1</sup>State Key Lab of Reproductive Medicine, <sup>2</sup>Department of Physiology, <sup>3</sup>Nanjing Maternity and Child Health Hospital, <sup>4</sup>Key Laboratory of Modern Toxicology of Ministry of Education, School of Public Health, Nanjing Medical University, Nanjing 210029, China,

\*Corresponding author: Ling Chen, Ph.D. & M.D.

Address: Department of Physiology, Nanjing Medical University, Hanzhong Road 140, Nanjing, China.

Tel: +86-25-86862878, Fax: +86-25-86260332

E-mail: lingchen@njmu.edu.cn

\*Corresponding author: Yankai Xia, Ph.D.

Address: State Key Laboratory of Reproductive Medicine, Institute of Toxicology, Nanjing Medical University, 818 East Tianyuan Road, Nanjing 211166, China.

Tel: +86-25-86868425, Fax: +86-25-86868427

E-mail: yankaixia@njmu.edu.cn

## Supplementary Figure 1

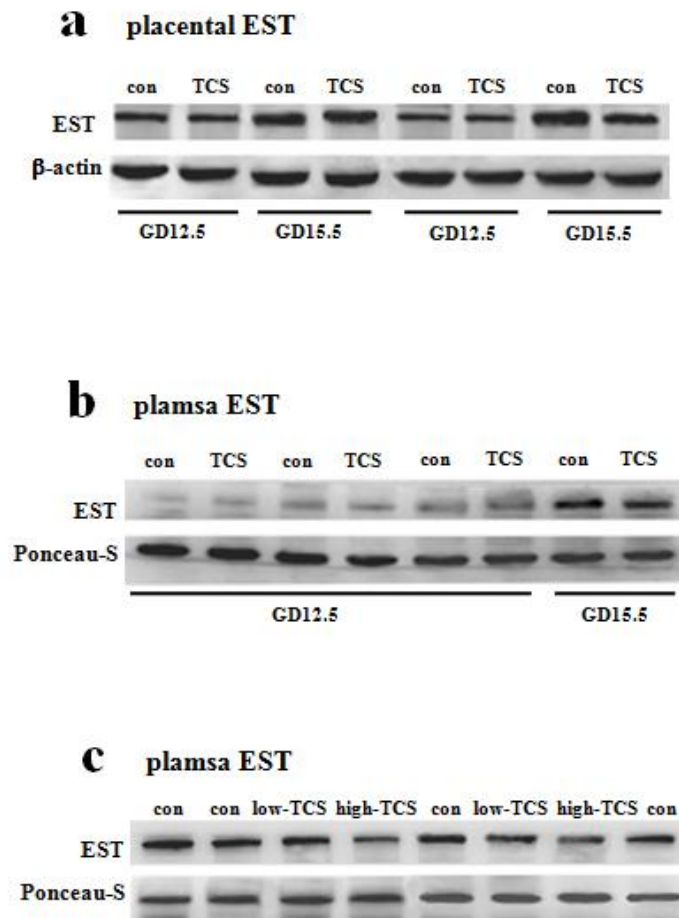

**Supplementary Figure 1 (a)** Full-length blots/gels of placental EST protein in GD12.5 and GD15.5 control mice and 100-TCS mice in the Figure 3b in the main paper. **(b)** Full-length blots/gels of plasma EST protein in GD12.5 and GD15.5 control mice and 100-TCS mice in the Figure 3c in the main paper. **(c)** Full-length blots/gels of plasma EST protein in control, low-TCS and high-TCS abortion patients in the Figure 3f in the main paper.
